# Supplementary material for: Advanced aqueous sodium-ion capacitors based on Ni0.25Mn0.75O nanoparticles encapsulated in electrospinning carbon nanofibers
Source: Royal Society of Chemistry journal article supplement (doi:10.1039/d2dt02412h), 2022-01-01
Supplement: d2dt02412h1.pdf [file d2dt02412h1.pdf]

## Supporting Information:

### Advanced aqueous sodium-ion capacitors based on $\text{Ni}_{0.25}\text{Mn}_{0.75}\text{O}$ nanoparticles encapsulated in electrospinning carbon nanofibers

Mingyu Gao<sup>a</sup>, Xinjian Song<sup>\*a</sup> and Jianfeng Tan<sup>\*bc</sup>

<sup>a</sup> Hubei Key Laboratory of Biological Resources Protection and Utilization, School of Chemical and Environmental Engineering, Hubei Minzu University, Enshi, Hubei 445000, P. R. China. E-mail: whxjsong@163.com

<sup>b</sup> Key Laboratory of Green Manufacturing of Super-light Elastomer Materials of State Ethnic Affairs Commission, Hubei Minzu University, Enshi, Hubei 445000, P. R. China. E-mail: tanjf.china@outlook.com

<sup>c</sup> College of Intelligent Systems Science and Engineering, Hubei Minzu University, Enshi, Hubei 445000, P. R. China.

\* Corresponding author

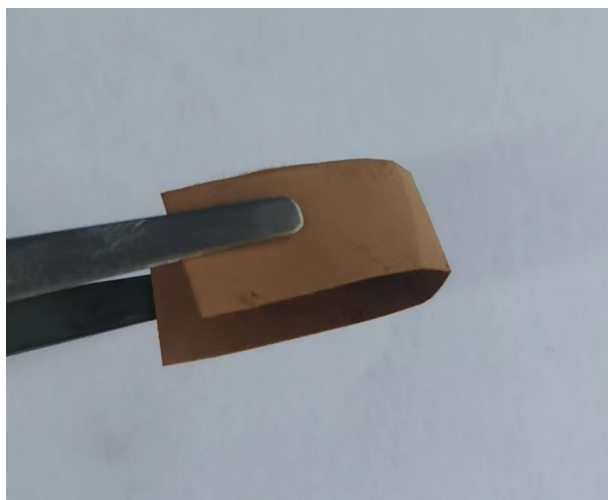

**Fig. S1** Photograph of pre-oxidized film.

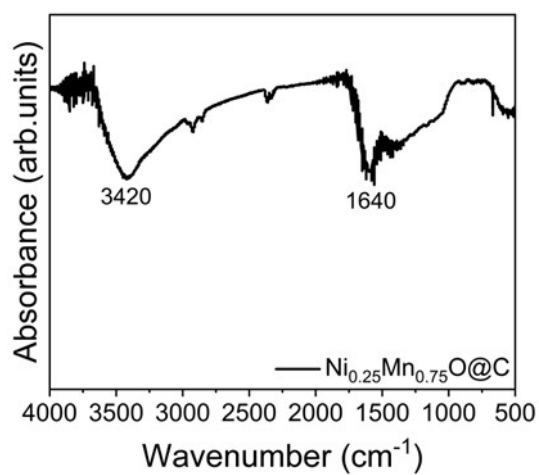

**Fig. S2** FTIR spectrum of NMO@C nanofibers film.

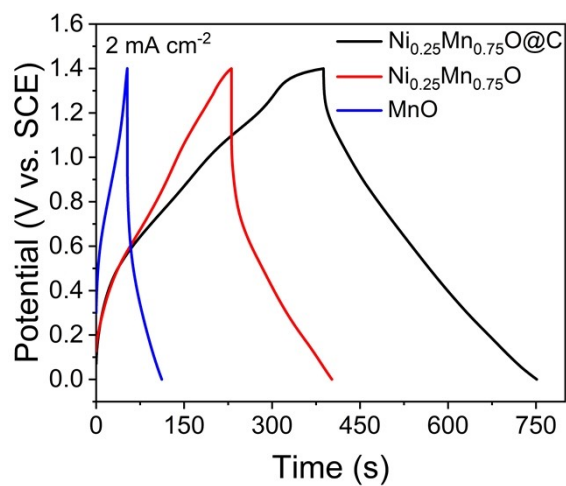

**Fig. S3** GCD curves of NMO@C nanofibers film, NMO array and MnO array electrodes.

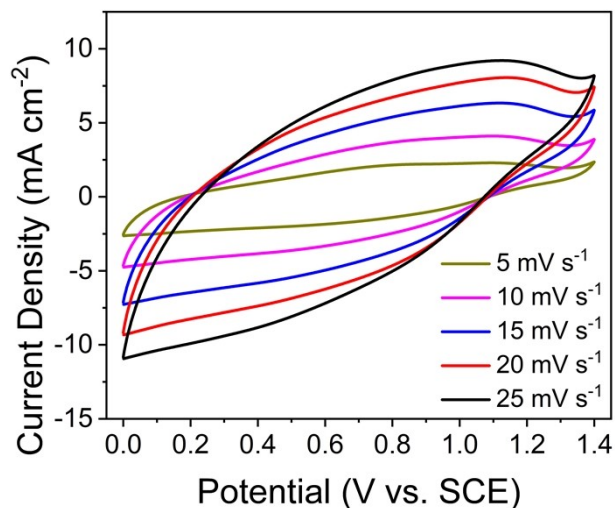

**Fig. S4** CV curves of the NMO@C nanofibers film electrode.

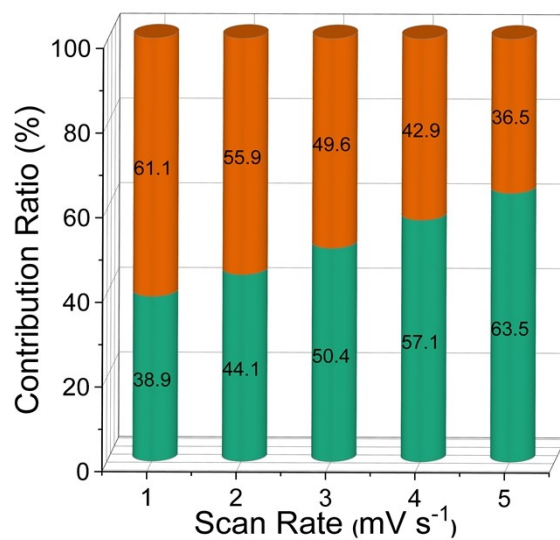

**Fig. S5** Capacitive contribution (green) to charge storage for NMO@C nanofibers film electrode.

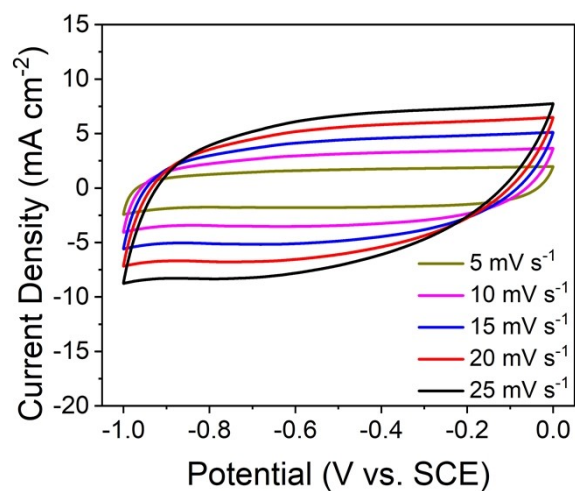

**Fig. S6** CV curves of AC electrode.

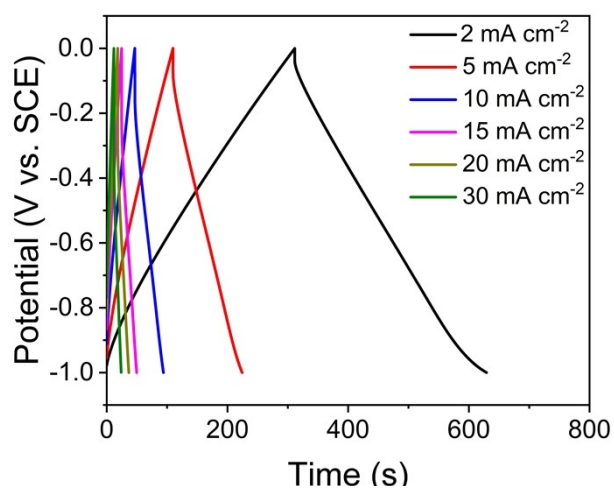

**Fig. S7** GCD curves of AC electrode.

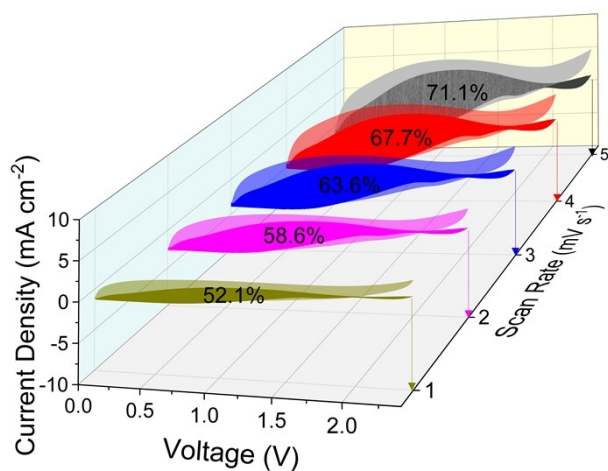

**Fig. S8** Capacitive contribution to charge storage for the device.

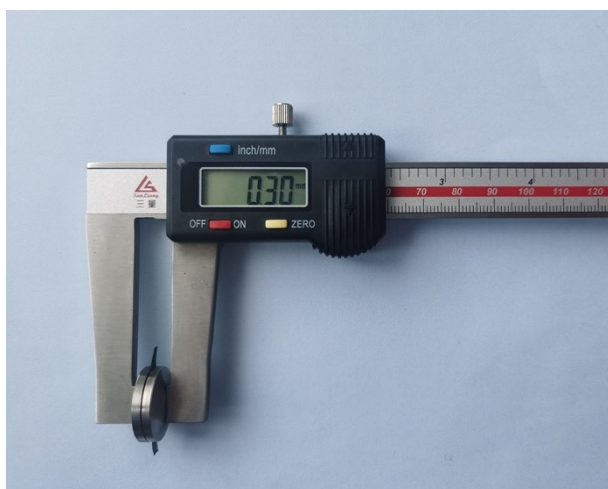

**Fig. S9** The thickness measurement of the full-cell device by using vernier caliper.
